# Supplementary figures and images for: Linear-time cluster ensembles of large-scale single-cell RNA-seq and multimodal data
Source: HighWire-hosted journal article supplement (doi:10.1101/gr.267906.120), 2021-02-24

Seurat (mRNA)

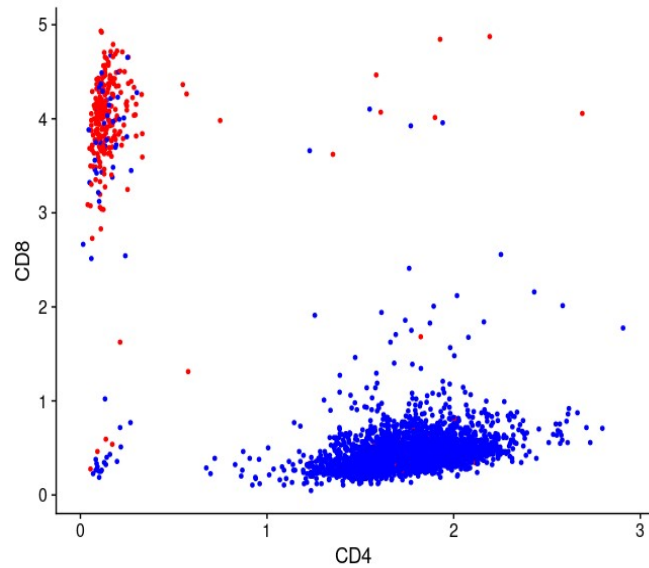

SCE (mRNA)

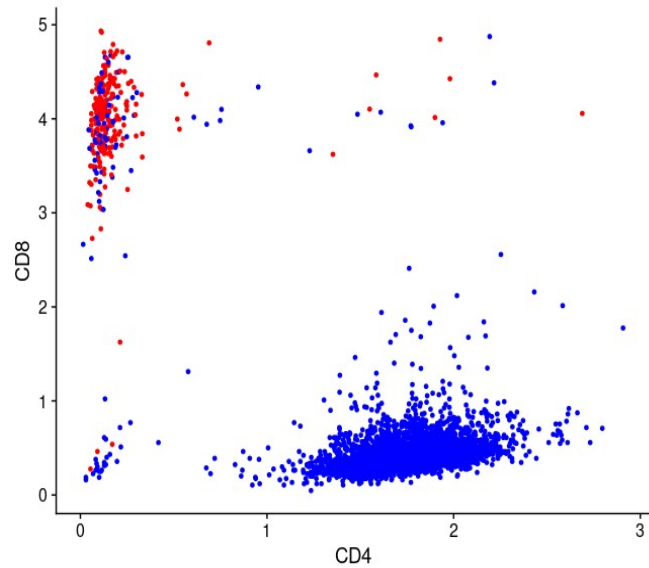

SCE (mRNA+ADT)

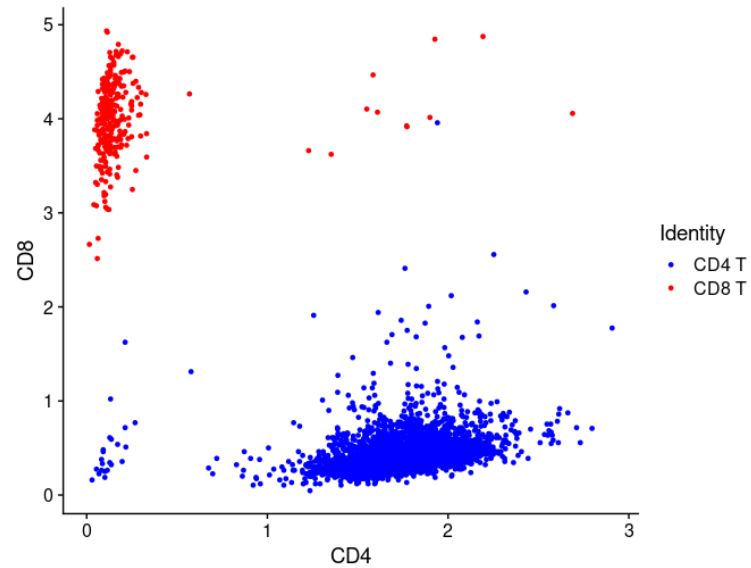

Supplement: Supplemental_Code.zip [file cd4_cd8_genes.pdf › Supplemental_Code/img/cd4_cd8_genes.pdf]
